# Supplementary material for: Model-based optimization approaches for precision medicine: A case study in presynaptic dopamine overactivity
Source: PLoS One. 2017 Jun 14;12(6):e0179575. doi: 10.1371/journal.pone.0179575 (PMC5470743; doi:10.1371/journal.pone.0179575)
Supplement: S2 Table — Candidates of biomarkers selected by cluster analysis and ROC curves for different dopamine disease levels. (XLSX) [file pone.0179575.s002.xlsx]

## Sheet: Sheet1
Dopamine 600				Dopamine 700				Dopamine 800				Dopamine 900				Dopamine 1000				Dopamine 1100				Dopamine 1200
Metabolites	p-value	ROC Curve (AUC)		Metabolites	p-value	ROC Curve (AUC)		Metabolites	p-value	ROC Curve (AUC)		Metabolites	p-value	ROC Curve (AUC)		Metabolites	p-value	ROC Curve (AUC)		Metabolites	p-value	ROC Curve (AUC)		Metabolites	p-value	ROC Curve (AUC)
Tyrosine (x1)	<0.001	0.95		Tyrosine (x1)	<0.001	0.95		Tyrosine (x1)	<0.001	0.95		Tyrosine (x1)	<0.001	0.95		Tyrosine (x1)	<0.001	0.95		Tyrosine (x1)	<0.001	0.95		Tyrosine (x1)	<0.001	0.98
Dihydrobiopterin (x2)	<0.001	0.95		Dihydrobiopterin (x2)	<0.001	0.95		Dihydrobiopterin (x2)	<0.001	0.95		Dihydrobiopterin (x2)	<0.001	0.95		Dihydrobiopterin (x2)	<0.001	0.95		Dihydrobiopterin (x2)	<0.001	0.95		Dihydrobiopterin (x2)	<0.001	0.95
Tyramine (x3)	<0.001	0.95		Tyramine (x3)	<0.001	0.95		Tyramine (x3)	<0.001	0.95		Tyramine (x3)	<0.001	0.95		Tyramine (x3)	<0.001	0.95		Tyramine (x3)	<0.001	0.95		Tyramine (x3)	<0.001	0.95
L-DOPA produced from tyrosine (x4)	<0.001	0.95		L-DOPA produced from tyrosine (x4)	<0.001	0.95		L-DOPA produced from tyrosine (x4)	<0.001	0.95		L-DOPA produced from tyrosine (x4)	<0.001	0.95		L-DOPA produced from tyrosine (x4)	<0.001	0.95		L-DOPA produced from tyrosine (x4)	<0.001	0.95		L-DOPA produced from tyrosine (x4)	<0.001	0.95
Dopaquinone (x5)	<0.001	0.95		Dopaquinone (x5)	<0.001	0.95		Dopaquinone (x5)	<0.001	0.95		Dopaquinone (x5)	<0.001	0.95		Dopaquinone (x5)	<0.001	0.95		Dopaquinone (x5)	<0.001	0.95		Dopaquinone (x5)	<0.001	0.95
Pyrrolo-quinoline quinone (x6)	<0.001	0.95		Pyrrolo-quinoline quinone (x6)	<0.001	0.95		Pyrrolo-quinoline quinone (x6)	<0.001	0.95		Pyrrolo-quinoline quinone (x6)	<0.001	0.95		Pyrrolo-quinoline quinone (x6)	<0.001	0.95		Pyrrolo-quinoline quinone (x6)	<0.001	0.95		Pyrrolo-quinoline quinone (x6)	<0.001	0.95
Intracellular dopamine (x7)	<0.001	0.95		Intracellular dopamine (x7)	<0.001	0.95		Intracellular dopamine (x7)	<0.001	0.95		Intracellular dopamine (x7)	<0.001	0.95		Intracellular dopamine (x7)	<0.001	0.95		Intracellular dopamine (x7)	<0.001	0.95		Intracellular dopamine (x7)	<0.001	0.95
Prostaglandin H2 (x15)	<0.001	0.95		Prostaglandin H2 (x15)	<0.001	0.95		Prostaglandin H2 (x15)	<0.001	0.95		Prostaglandin H2 (x15)	<0.001	0.95		Prostaglandin H2 (x15)	<0.001	0.95		Prostaglandin H2 (x15)	<0.001	0.95		Prostaglandin H2 (x15)	<0.001	0.95
Dopamine quinone (x16)	<0.001	0.95		Dopamine quinone (x16)	<0.001	0.95		Dopamine quinone (x16)	<0.001	0.95		Dopamine quinone (x16)	<0.001	0.95		Dopamine quinone (x16)	<0.001	0.95		Dopamine quinone (x16)	<0.001	0.95		Dopamine quinone (x16)	<0.001	0.95
Dopamine chrome (x17)	<0.001	0.95		Dopamine chrome (x17)	<0.001	0.95		Dopamine chrome (x17)	<0.001	0.95		Dopamine chrome (x17)	<0.001	0.95		Dopamine chrome (x17)	<0.001	0.95		Dopamine chrome (x17)	<0.001	0.95		Dopamine chrome (x17)	<0.001	0.95
L-Dopachrome (x19)	<0.001	0.95		L-Dopachrome (x19)	<0.001	0.95		L-Dopachrome (x19)	<0.001	0.95		L-Dopachrome (x19)	<0.001	0.95		L-Dopachrome (x19)	<0.001	0.95		L-Dopachrome (x19)	<0.001	0.95		L-Dopachrome (x19)	<0.001	0.95
5,6-Dihydroxyindole (x20)	<0.001	0.95		5,6-Dihydroxyindole (x20)	<0.001	0.95		5,6-Dihydroxyindole (x20)	<0.001	0.95		5,6-Dihydroxyindole (x20)	<0.001	0.95		5,6-Dihydroxyindole (x20)	<0.001	0.95		5,6-Dihydroxyindole (x20)	<0.001	0.95		5,6-Dihydroxyindole (x20)	<0.001	0.95
Indole-5,6-quinone (x21)	<0.001	0.95		Indole-5,6-quinone (x21)	<0.001	0.95		Indole-5,6-quinone (x21)	<0.001	0.95		Indole-5,6-quinone (x21)	<0.001	0.95		Indole-5,6-quinone (x21)	<0.001	0.95		Indole-5,6-quinone (x21)	<0.001	0.95		Indole-5,6-quinone (x21)	<0.001	0.95
5,6-Dihydroxyindole-2-carboxylate (x22)	<0.001	0.95		5,6-Dihydroxyindole-2-carboxylate (x22)	<0.001	0.95		5,6-Dihydroxyindole-2-carboxylate (x22)	<0.001	0.95		5,6-Dihydroxyindole-2-carboxylate (x22)	<0.001	0.95		5,6-Dihydroxyindole-2-carboxylate (x22)	<0.001	0.95		5,6-Dihydroxyindole-2-carboxylate (x22)	<0.001	0.95		5,6-Dihydroxyindole-2-carboxylate (x22)	<0.001	0.95
Melanin (x23)	<0.001	0.95		Melanin (x23)	<0.001	0.95		Melanin (x23)	<0.001	0.95		Melanin (x23)	<0.001	0.95		Melanin (x23)	<0.001	0.95		Melanin (x23)	<0.001	0.95		Melanin (x23)	<0.001	0.95
Intracellular DOPAL (x24)	<0.001	0.95		Intracellular DOPAL (x24)	<0.001	0.95		Intracellular DOPAL (x24)	<0.001	0.95		Intracellular DOPAL (x24)	<0.001	0.95		Intracellular DOPAL (x24)	<0.001	0.95		Intracellular DOPAL (x24)	<0.001	0.95		Intracellular DOPAL (x24)	<0.001	0.95
Intracellular DOPAC (x25)	<0.001	0.95		Intracellular DOPAC (x25)	<0.001	0.95		Intracellular DOPAC (x25)	<0.001	0.95		Intracellular DOPAC (x25)	<0.001	0.95		Intracellular DOPAC (x25)	<0.001	0.95		Intracellular DOPAC (x25)	<0.001	0.95		Intracellular DOPAC (x25)	<0.001	0.95
DOPAC quinone (x26)	<0.001	0.95		DOPAC quinone (x26)	<0.001	0.95		DOPAC quinone (x26)	<0.001	0.95		DOPAC quinone (x26)	<0.001	0.95		DOPAC quinone (x26)	<0.001	0.95		DOPAC quinone (x26)	<0.001	0.95		DOPAC quinone (x26)	<0.001	0.95
Superoxide O2 − . (x27)	<0.001	0.95		Superoxide O2 − . (x27)	<0.001	0.95		Superoxide O2 − . (x27)	<0.001	0.95		Superoxide O2 − . (x27)	<0.001	0.95		Superoxide O2 − . (x27)	<0.001	0.95		Superoxide O2 − . (x27)	<0.001	0.95		Superoxide O2 − . (x27)	<0.001	0.95
Intracellular hydrogen peroxide H2O2 (x28)	<0.001	0.95		Intracellular hydrogen peroxide H2O2 (x28)	<0.001	0.95		Intracellular hydrogen peroxide H2O2 (x28)	<0.001	0.95		Intracellular hydrogen peroxide H2O2 (x28)	<0.001	0.95		Intracellular hydrogen peroxide H2O2 (x28)	<0.001	0.95		Intracellular hydrogen peroxide H2O2 (x28)	<0.001	0.95		Intracellular hydrogen peroxide H2O2 (x28)	<0.001	0.95
hydroxyl radical HO· (x30)	<0.001	0.95		hydroxyl radical HO· (x30)	<0.001	0.95		hydroxyl radical HO· (x30)	<0.001	0.95		hydroxyl radical HO· (x30)	<0.001	0.95		hydroxyl radical HO· (x30)	<0.001	0.95		hydroxyl radical HO· (x30)	<0.001	0.95		hydroxyl radical HO· (x30)	<0.001	0.95
Peroxynitrite HO· — NO2 . (x31)	<0.001	0.95		Peroxynitrite HO· — NO2 . (x31)	<0.001	0.95		Peroxynitrite HO· — NO2 . (x31)	<0.001	0.95		Peroxynitrite HO· — NO2 . (x31)	<0.001	0.95		Peroxynitrite HO· — NO2 . (x31)	<0.001	0.95		Peroxynitrite HO· — NO2 . (x31)	<0.001	0.95		Peroxynitrite HO· — NO2 . (x31)	0.001	0.95
Oxidized glutathione (x33)	<0.001	0.95		Oxidized glutathione (x33)	<0.001	0.95		Oxidized glutathione (x33)	<0.001	0.95		Oxidized glutathione (x33)	<0.001	0.95		Oxidized glutathione (x33)	<0.001	0.95		Oxidized glutathione (x33)	<0.001	0.95		Oxidized glutathione (x33)	<0.001	0.95
Dehydroascorbate (x34)	<0.001	0.95		Dehydroascorbate (x34)	<0.001	0.95		Dehydroascorbate (x34)	<0.001	0.95		Dehydroascorbate (x34)	<0.001	0.95		Dehydroascorbate (x34)	<0.001	0.95		Dehydroascorbate (x34)	<0.001	0.95		Dehydroascorbate (x34)	<0.001	0.95
